# Supplementary material for: Structural cutting and recombining in layered sodium dysprosium phosphonate: key roles of flexible pyrazinyl hydrazone molecular tools
Source: Royal Society of Chemistry journal article supplement (doi:10.1039/d2ce01161a), 2022-01-01
Supplement: d2ce01161a1.pdf [file d2ce01161a1.pdf]

## Supporting Information

### **Structural cutting and recombining in a layered sodium dysprosium phosphonate: key roles of flexible pyrazinyl hydrazone molecular tools<sup>†</sup>**

Xiao Sun,<sup>a</sup> Peiqiong Chen,<sup>a</sup> Yanan Liu,<sup>a</sup> Hou-Ting Liu<sup>\*a</sup> and Haiquan Tian<sup>\*a</sup>

<sup>a</sup> Shandong Provincial Key Laboratory of Chemical Energy Storage and Novel Cell Technology, School of Chemistry and Chemical Engineering, Liaocheng University, Liaocheng 252059, P. R. China. E-mail: [tianhaiquan@lcu.edu.cn](mailto:tianhaiquan@lcu.edu.cn), [liuhouting@lcu.edu.cn](mailto:liuhouting@lcu.edu.cn)

**Table S1.** Selected bond lengths (Å) and angles (°) for **1**.

| Compound 1 |           |           |           |           |           |             |           |
|------------|-----------|-----------|-----------|-----------|-----------|-------------|-----------|
| Dy1–O1     | 2.334(9)  | Dy6···Na3 | 3.7346(1) | Dy5···Na3 | 3.7524(1) | Dy3···Na1   | 9.9315(3) |
| Dy1–O2     | 2.247(10) | Dy6···Na3 | 7.8328(3) | Dy5···Na1 | 7.3023(2) | Dy4···Na5   | 3.9729(1) |
| Dy1–O13    | 2.378(8)  | Dy2–N5    | 3.1187(2) | Dy6···Na1 | 3.7841(1) | Dy4···Na3   | 9.4972(3) |
| Dy1–O19    | 2.493(8)  | Dy3–O4    | 2.347(9)  | Dy6···Na4 | 8.1641(3) | Dy5···Dy6   | 3.9638(1) |
| Dy1–O20    | 2.288(9)  | Dy3–O5    | 2.274(10) | Dy4–N16   | 2.505(12) | Dy5···Na2   | 9.2912(3) |
| Dy1–O22    | 2.303(9)  | Dy3–O7    | 2.340(8)  | Dy5–O16   | 2.392(9)  | Dy6···Na5   | 6.5693(2) |
| Dy1–N4     | 2.514(13) | Dy3–O26   | 2.271(9)  | Dy5–O21   | 2.343(10) | Na1···Na3   | 7.3825(3) |
| Dy1–N17    | 2.532(11) | Dy3–O27   | 2.462(8)  | Dy5–O23   | 2.460(9)  | Na1···Na2   | 9.0417(3) |
| Dy2–O1     | 2.828(9)  | Dy3–O28   | 2.342(10) | Dy5–O24   | 2.461(9)  | Na2···Na4   | 7.0537(2) |
| Dy2–O4     | 2.758(9)  | Dy3–N8    | 2.561(10) | Dy5–O30   | 2.196(9)  | Na3···Na4   | 9.5088(3) |
| Dy2–O20    | 3.1070(1) | Dy3–N9    | 2.596(11) | Dy5–O33   | 2.366(10) | Na1···Na3   | 9.0770(3) |
| Dy2–O22    | 2.9914(1) | Dy4–O7    | 2.484(8)  | Dy5–N21   | 2.598(13) | Na1···Na5   | 9.4702(3) |
| Dy2–O23    | 2.8837(2) | Dy4–O8    | 2.250(10) | Dy6–O13   | 2.487(8)  | Na3···Na5   | 6.4419(2) |
| Dy2–O26    | 3.0751(3) | Dy4–O10   | 2.393(9)  | Dy6–O14   | 2.276(8)  | Na2···Na5   | 7.1192(2) |
| Dy2–O28    | 2.8712(1) | Dy4–O11   | 2.259(10) | Dy6–O16   | 2.416(7)  | Na4···Na5   | 3.0644(1) |
| Dy2–N1     | 3.1168(2) | Dy4–O27   | 2.380(8)  | Dy6–O17   | 2.239(10) | Dy1–O1–Dy2  | 103.2(3)  |
| Na1–O2     | 2.415(11) | Dy4–O29   | 2.298(9)  | Dy6–O19   | 2.323(8)  | Dy1–O2–Na1  | 105.1(4)  |
| Na1–O3     | 2.375(13) | Dy4–N12   | 2.570(11) | Dy6–O24   | 2.348(8)  | Dy3–O7–Na2  | 99.9(3)   |
| Na1–O13    | 2.506(11) | Na3–O36   | 2.378(19) | Dy6–N20   | 2.557(13) | Dy4–O10–Na4 | 89.2(4)   |
| Na1–O17    | 2.319(11) | Na4–O8    | 2.397(12) | Dy6–N24   | 2.556(11) | Dy4–O11–Na2 | 108.7(4)  |
| Na1–O18    | 2.519(12) | Na4–O10   | 2.490(13) | P2–O23    | 1.524(10) | Dy6–O13–Na1 | 98.6(3)   |
| Na1–O34    | 2.292(12) | Na4–O29   | 2.453(11) | P2–O24    | 1.531(9)  | Dy5–O16–Na3 | 100.5(4)  |
| Na2–O5     | 2.380(11) | Na4–O31   | 2.600(15) | P2–C89    | 1.789(15) | Dy1–O19–Dy6 | 114.0(4)  |
| Na2–O6     | 2.335(13) | Na4–O37   | 2.69(3)   | P3–O25    | 1.459(10) | Dy3–O27–Dy4 | 111.6(3)  |
| Na2–O7     | 2.535(10) | Na5–O10   | 2.291(12) | P3–O26    | 1.555(11) | Dy5–O31–Na5 | 97.0(5)   |
| Na2–O11    | 2.299(11) | Na5–O23   | 2.302(12) | P3–O27    | 1.540(8)  | Dy2–O4–Dy3  | 102.8(3)  |
| Na2–O12    | 2.400(13) | Na5–O25   | 2.543(13) | P3–C99    | 1.878(19) | Dy4–O7–Na2  | 95.1(3)   |
| Na2–O35    | 2.295(12) | Na5–O31   | 2.127(14) | P4–O28    | 1.521(11) | Dy4–O10–Na5 | 116.0(4)  |
| Na3–O14    | 2.401(11) | Na5–N13   | 2.500(16) | P4–O29    | 1.516(9)  | Dy1–O13–Dy6 | 112.3(3)  |
| Na3–O15    | 2.235(12) | P1–O19    | 1.545(10) | P4–O30    | 1.526(10) | Dy6–O14–Na3 | 105.9(4)  |
| Na3–O16    | 2.488(9)  | P1–O20    | 1.522(11) | P4–C109   | 1.809(15) | Dy6–O16–Na3 | 99.2(3)   |
| Na3–O33    | 2.238(14) | P1–O21    | 1.502(10) | P5–O31    | 1.540(13) | Dy5–O23–Na5 | 90.6(3)   |
| Dy1···Dy6  | 4.0403(1) | P1–C79    | 1.785(15) | P5–O32    | 1.458(14) | Dy4–O29–Na4 | 92.3(4)   |
| Dy1···Na5  | 6.8952(2) | P2–O22    | 1.514(9)  | P5–O33    | 1.548(12) | Na4–O31–Na5 | 80.2(5)   |
| Dy1···Na4  | 9.3144(3) | Dy1···Dy2 | 4.0562(1) | P5–C119   | 1.856(18) | Dy3–O5–Na2  | 106.7(4)  |
| Dy2···Dy5  | 4.2016(1) | Dy1···Na3 | 7.3664(3) | Dy1···Na1 | 3.7016(1) | Dy4–O8–Na4  | 95.0(4)   |
| Dy2···Dy4  | 6.1982(2) | Dy1···Na2 | 9.9431(3) | Dy1···Dy5 | 5.4053(2) | Na4–O10–Na5 | 79.6(4)   |
| Dy2···Na2  | 7.5940(2) | Dy2···Na5 | 4.2297(1) | Dy1···Dy3 | 8.0166(2) | Dy1–O13–Na1 | 98.6(3)   |
| Dy3···Dy4  | 4.0040(1) | Dy2···Na4 | 6.5205(2) | Dy2···Dy3 | 3.9970(1) | Dy5–O16–Dy6 | 111.1(3)  |
| Dy3···Dy5  | 6.6637(2) | Dy2···Na3 | 7.7451(2) | Dy2···Dy6 | 6.0670(2) | Dy6–O17–Na1 | 112.2(5)  |
| Dy4···Na4  | 3.4268(1) | Dy3···Na5 | 5.1605(2) | Dy2···Na1 | 7.5794(2) | Dy5–O24–Dy6 | 111.0(3)  |
| Dy4···Dy5  | 6.3877(2) | Dy3···Dy6 | 9.7190(3) | Dy3···Na2 | 3.7341(1) | Dy5–O31–Na4 | 124.3(5)  |
| Dy5···Na5  | 3.3855(1) | Dy4···Na2 | 3.7043(1) | Dy3···Na4 | 6.3243(2) | Dy5–O33–Na3 | 109.1(5)  |
| Dy5···Na4  | 4.4111(1) | Dy4···Na4 | 9.4243(3) |           |           |             |           |

**Table S2.** Selected bond lengths (Å) and angles (°) for **2**.

| Compound 2 |           |         |           |            |            |             |           |
|------------|-----------|---------|-----------|------------|------------|-------------|-----------|
| Dy1–O20    | 2.293(13) | Dy4–O46 | 2.405(15) | P3–O39     | 1.522(16)  | Na1–O43     | 2.60(2)   |
| Dy1–O22    | 2.327(13) | Dy4–O47 | 2.383(13) | P3–O40     | 1.49(2)    | Na1–O49     | 2.39(3)   |
| Dy1–O27    | 2.314(17) | Dy5–O17 | 2.33(2)   | P3–C22     | 1.87(2)    | Na2–O7      | 2.37(2)   |
| Dy1–O28    | 2.290(16) | Dy5–O18 | 2.280(14) | P4–O22     | 1.522(15)  | Na2–O8      | 2.513(17) |
| Dy1–O44    | 2.421(16) | Dy5–O28 | 2.465(15) | P4–O23     | 1.484(17)  | Na2–O29     | 2.493(18) |
| Dy1–O46    | 2.332(14) | Dy5–O29 | 2.408(14) | P4–O24     | 1.528(14)  | Na2–O31     | 2.711(18) |
| Dy1–O47    | 2.334(14) | Dy5–O31 | 2.237(14) | P4–C32     | 1.810(16)  | Na2–O33     | 2.520(19) |
| Dy2–O9     | 2.456(15) | Dy5–O36 | 2.259(14) | P5–O35     | 1.533(15)  | Na2–O34     | 2.38(3)   |
| Dy2–O10    | 2.267(17) | Dy5–O47 | 2.431(14) | P5–O36     | 1.510(17)  | Na2–N6b     | 2.72(2)   |
| Dy2–O12    | 2.382(17) | Dy6–O3  | 2.470(17) | P5–O37     | 1.479(17)  | Na3–O4      | 2.41(2)   |
| Dy2–O24    | 2.290(14) | Dy6–O5  | 2.264(17) | Na3–N2d    | 2.67(2)    | Na4–O15     | 2.64(2)   |
| Dy2–O39    | 2.230(14) | Dy6–O6  | 2.40(2)   | Na4–O10    | 2.430(17)  | Na4–O23     | 2.692(17) |
| Dy2–O48    | 2.472(12) | Dy6–O19 | 2.280(15) | Na4–O11    | 2.36(2)    | Na4–O24     | 2.594(19) |
| Dy2–N1     | 2.601(16) | Dy6–O21 | 2.473(15) | Na4–O40    | 2.49(2)    | Dy7–O15–Na4 | 86.6(7)   |
| Dy2–N8     | 2.501(17) | Dy6–O37 | 2.247(14) | Dy1⋯Dy2    | 5.7425(13) | Dy6–O6–Dy8  | 104.2(7)  |
| Dy3–O8     | 2.230(17) | Dy6–N11 | 2.645(19) | Dy1⋯Dy3    | 5.7731(13) | Dy6–O19–Na3 | 96.2(6)   |
| Dy3–O9     | 2.370(16) | Dy6–N15 | 2.49(2)   | Dy1⋯Dy4    | 3.8799(13) | Dy6–O21–Dy8 | 98.7(4)   |
| Dy3–O12    | 2.433(15) | Dy7–O14 | 2.66(2)   | Dy1⋯Dy5    | 3.8094(13) | Dy5–O36–Na3 | 96.6(6)   |
| Dy3–O30    | 2.258(13) | Dy7–O15 | 2.43(2)   | Dy1⋯Dy6    | 5.8121(14) | Dy7–O40–Na4 | 94.0(6)   |
| Dy3–O33    | 2.310(15) | Dy7–O23 | 2.327(14) | Dy1⋯Dy7    | 3.8596(14) | Dy2–O9–Dy3  | 103.2(5)  |
| Dy3–O48    | 2.472(12) | Dy7–O26 | 2.426(16) | Dy1⋯Dy8    | 5.8359(14) | Dy2–O10–Na4 | 99.1(6)   |
| Dy3–N4     | 2.472(17) | Dy7–O27 | 2.480(15) | Dy2⋯Dy3    | 3.7839(13) | Dy2–O12–Dy3 | 103.6(5)  |
| Dy3–N5     | 2.609(17) | Dy7–O40 | 2.271(16) | Dy2⋯Dy4    | 5.6291(13) | Dy7–O14–Na1 | 88.2(8)   |
| Dy4–O32    | 2.274(14) | Dy7–O43 | 2.254(16) | Dy2⋯Dy5    | 7.3551(18) | Dy6–O5–Na3  | 98.6(6)   |
| Dy4–O35    | 2.312(16) | Dy7–O46 | 2.494(17) | Dy2⋯Dy6    | 9.3316(16) | Dy5–O18–Na3 | 94.9(6)   |
| Dy4–O38    | 2.273(16) | Dy8–O2  | 2.22(2)   | Dy2⋯Dy7    | 5.4327(13) | Dy3–O33–Na2 | 96.0(6)   |
| Dy4–O41    | 2.257(16) | Dy8–O3  | 2.344(16) | Dy3⋯Dy4    | 6.0339(13) | Dy7–O23–Na4 | 87.7(5)   |
| Dy4–O45    | 2.347(16) | Dy8–O6  | 2.39(2)   | Dy3⋯Dy5    | 5.4486(14) | Dy2–O24–Na4 | 94.0(5)   |
| Dy8–O21    | 2.505(16) | P6–C52  | 1.839(16) | Dy3⋯Dy7    | 7.6393(18) | Dy7–O26–Na1 | 96.4(7)   |
| Dy8–O25    | 2.268(17) | P7–O41  | 1.54(2)   | Dy4⋯Dy5    | 4.2939(13) | Dy1–O27–Dy7 | 107.2(5)  |
| Dy8–O42    | 2.217(17) | P7–O42  | 1.506(17) | Dy4⋯Dy6    | 5.6412(14) | Dy1–O28–Dy5 | 106.4(5)  |
| Dy8–N9     | 2.43(2)   | P7–O43  | 1.48(2)   | Dy4⋯Dy7    | 4.3789(13) | Dy5–O29–Na2 | 103.6(6)  |
| Dy8–N12    | 2.62(3)   | P7–C62  | 1.767(18) | Dy4⋯Dy8    | 5.9576(14) | Dy1–O46–Dy7 | 106.2(5)  |
| P1–O31     | 1.498(15) | P8–O25  | 1.490(15) | Dy5⋯Dy6    | 5.4598(14) | Dy5–O31–Na2 | 101.8(6)  |
| P1–O32     | 1.540(19) | P8–O26  | 1.553(19) | Dy5⋯Dy7    | 7.1309(18) | Dy1–O47–Dy5 | 106.1(5)  |
| P1–O33     | 1.495(14) | P8–O27  | 1.543(16) | Dy5⋯Dy8    | 7.6029(18) | Dy8–O42–Na1 | 95.2(7)   |
| P1–C1      | 1.803(19) | P8–C72  | 1.843(18) | Dy6⋯Dy7    | 7.3901(18) | Dy7–O43–Na1 | 96.7(7)   |
| P2–O28     | 1.568(16) | Na1–O1  | 2.44(3)   | Dy6⋯Dy8    | 3.7774(18) | Dy1–O46–Dy4 | 110.0(6)  |
| P2–O29     | 1.521(18) | Na1–O2  | 2.48(2)   | Dy7⋯Dy8    | 5.3935(16) | Dy4–O46–Dy7 | 126.7(6)  |
| P2–O30     | 1.500(14) | Na1–O14 | 2.56(2)   | Dy3–O8–C93 | 137.9(16)  | Dy1–O47–Dy4 | 110.7(6)  |
| P2–C11     | 1.817(17) | Na1–O26 | 2.44(2)   | Dy8–O2–Na1 | 100.8(8)   | Dy4–O47–Dy5 | 126.3(6)  |
| P3–O38     | 1.515(16) | Na1–O42 | 2.68(2)   | Dy6–O3–Dy8 | 103.4(6)   | Dy2–O48–Dy3 | 99.9(3)   |

**Table S3.** Hydrogen bonds in **1**.

| Compound 1      |            |              |              |            |
|-----------------|------------|--------------|--------------|------------|
| D–H···A         | d(D–H) (Å) | d(H···A) (Å) | d(D···A) (Å) | <(DHA) (°) |
| O34–H34b···N10  | 0.8500     | 2.1500       | 2.81(2)      | 134.00     |
| O34–H34c···N2   | 0.8500     | 2.5200       | 2.944(16)    | 112.00     |
| O35–H35b···N18  | 0.8500     | 2.5600       | 2.851(19)    | 101.00     |
| O35–H35c···N6   | 0.8500     | 2.1700       | 2.912(17)    | 145.00     |
| O37–H37b···O32  | 0.8500     | 2.3000       | 2.77(3)      | 115.00     |
| C1–H1···O26     | 0.9300     | 2.3800       | 3.081(19)    | 132.00     |
| C129–H12a···O36 | 0.9600     | 1.9600       | 2.78(5)      | 142.00     |
| C129–H12c···O32 | 0.9600     | 2.0200       | 2.71(5)      | 126.00     |
| C14–H14···O20   | 0.9300     | 2.3100       | 3.01(2)      | 132.00     |
| C42–H42···N15   | 0.9300     | 2.4400       | 2.77(2)      | 101.00     |
| C55–H55···N19   | 0.9300     | 2.4900       | 2.80(2)      | 100.00     |
| C80–H80···O21   | 0.9300     | 2.4900       | 2.899(19)    | 107.00     |
| C82–H82···N15   | 0.9300     | 2.6100       | 3.36(3)      | 139.00     |
| C87–H87···O19   | 0.9300     | 2.4400       | 3.016(19)    | 120.00     |
| C90–H90···O24   | 0.9300     | 2.5200       | 2.95(2)      | 108.00     |
| C97–H97···O22   | 0.9300     | 2.2700       | 2.96(2)      | 131.00     |
| C100–H100···O27 | 0.9300     | 2.3800       | 2.87(2)      | 112.00     |
| C110–H110···O29 | 0.9300     | 2.5500       | 2.96(2)      | 107.00     |
| C117–H117···O28 | 0.9300     | 2.3700       | 3.07(2)      | 132.00     |
| C120–H120···O33 | 0.9300     | 2.5200       | 2.94(2)      | 108.00     |
| C127–H127···O32 | 0.9300     | 2.3700       | 3.04(3)      | 130.00     |

Symmetry codes: (a) x, y, -1+z; (b) -x, -y, -z; (c) 1+x, y, z.

**Table S4.** Hydrogen bonds in **2**.

| Compound 2      |            |              |              |            |
|-----------------|------------|--------------|--------------|------------|
| D–H···A         | d(D–H) (Å) | d(H···A) (Å) | d(D···A) (Å) | <(DHA) (°) |
| O13–H13b···N16  | 0.8500     | 2.2600       | 2.82(3)      | 124.00     |
| O34–H34a···O17  | 0.8500     | 2.2200       | 2.78(3)      | 124.00     |
| C2–H2···O31     | 0.9300     | 2.4200       | 2.86(2)      | 109.00     |
| C12–H12···O30   | 0.9300     | 2.4600       | 2.89(2)      | 108.00     |
| C120–H12a···O16 | 0.9600     | 2.4000       | 3.21(4)      | 141.00     |
| C17–H17···O29   | 0.9300     | 2.2500       | 3.00(3)      | 137.00     |
| C23–H23···O39   | 0.9300     | 2.5400       | 2.92(3)      | 104.00     |
| C28–H28···O40   | 0.9300     | 2.2800       | 3.05(3)      | 140.00     |
| C33–H33···O23   | 0.9300     | 2.3600       | 2.84(2)      | 112.00     |
| C40–H40···O9    | 0.9300     | 2.6000       | 3.36(2)      | 139.00     |
| C43–H43···O36   | 0.9300     | 2.4500       | 2.86(3)      | 107.00     |
| C50–H50···O37   | 0.9300     | 2.3900       | 3.13(3)      | 136.00     |
| C53–H53···O18   | 0.9300     | 2.4800       | 2.92(2)      | 109.00     |
| C60–H60···O20   | 0.9300     | 2.5500       | 3.18(2)      | 125.00     |
| C63–H63···O43   | 0.9300     | 2.4000       | 2.85(3)      | 110.00     |
| C73–H73···O27   | 0.9300     | 2.5100       | 2.96(2)      | 110.00     |
| C8–H80···O25    | 0.9300     | 2.4000       | 3.01(3)      | 123.00     |
| C82–H82···O10   | 0.9300     | 2.4900       | 3.07(2)      | 121.00     |
| C94–H94a···O34  | 0.9600     | 2.3900       | 3.15(4)      | 135.00     |
| C96–H96···O33   | 0.9300     | 2.5400       | 3.27(3)      | 136.00     |
| C121–H121···O5  | 0.9300     | 2.5800       | 3.14(3)      | 119.00     |

Symmetry codes: (a) -x, 2-y, -z; (b) x, -1+y, z.

**Table S5.** Dy<sup>III</sup> and Na<sup>I</sup> geometry analysis of **1** by SHAPE 2.1 software.

| Dy                |                                                                    |         |                                                     |          |                                                               |            |                                                                                   |                   |                                                              |
|-------------------|--------------------------------------------------------------------|---------|-----------------------------------------------------|----------|---------------------------------------------------------------|------------|-----------------------------------------------------------------------------------|-------------------|--------------------------------------------------------------|
| Geometry (CN = 8) |                                                                    | Dy1     | Dy3                                                 | Dy4      | Dy5                                                           | Dy6        | Geometry (CN = 10)                                                                |                   | Dy2                                                          |
| TDD-8             |                                                                    | 3.061   | 2.881                                               | 3.125    | 2.712                                                         | 2.573      | PARP-10                                                                           |                   | 3.431                                                        |
| BTPR-8            |                                                                    | 3.110   | 3.090                                               | 2.123    | 2.679                                                         | 2.472      | SDD-10                                                                            |                   | 5.613                                                        |
| JSD-8             |                                                                    | 3.485   | 3.538                                               | 3.282    | 5.988                                                         | 2.319      | HD-10                                                                             |                   | 6.591                                                        |
| JBTPR-8           |                                                                    | 4.248   | 4.312                                               | 2.670    | 3.571                                                         | 3.149      | TD-10                                                                             |                   | 7.416                                                        |
| SAPR-8            |                                                                    | 5.341   | 4.772                                               | 3.942    | 4.377                                                         | 5.007      | JMBIC-10                                                                          |                   | 7.547                                                        |
| JGBF-8            |                                                                    | 9.787   | 9.786                                               | 10.082   | 12.443                                                        | 9.223      | JBCCU-10                                                                          |                   | 9.655                                                        |
| CU-8              |                                                                    | 11.616  | 12.003                                              | 9.334    | 10.367                                                        | 12.614     | PPR-10                                                                            |                   | 9.834                                                        |
| TT-8              |                                                                    | 12.189  | 12.582                                              | 9.774    | 10.998                                                        | 13.262     | JSPC-10                                                                           |                   | 12.936                                                       |
| HBPY-8            |                                                                    | 12.885  | 12.723                                              | 12.507   | 13.921                                                        | 14.016     | JBCSAPR-10                                                                        |                   | 13.388                                                       |
| ETBPY-8           |                                                                    | 21.041  | 21.636                                              | 20.191   | 21.739                                                        | 20.115     | JATDI-10                                                                          |                   | 14.600                                                       |
| JETBPY-8          |                                                                    | 25.982  | 26.470                                              | 24.577   | 24.200                                                        | 24.309     | OBPY-10                                                                           |                   | 15.740                                                       |
| HPY-8             |                                                                    | 24.390  | 25.016                                              | 24.114   | 21.173                                                        | 24.088     | EPY-10                                                                            |                   | 24.156                                                       |
| OP-8              |                                                                    | 31.937  | 30.971                                              | 31.950   | 34.252                                                        | 32.016     | DP-10                                                                             |                   | 25.993                                                       |
| Na                |                                                                    |         |                                                     |          |                                                               |            |                                                                                   |                   |                                                              |
| Geometry (CN = 6) |                                                                    | Na1     | Na2                                                 | Na5      | Geometry (CN = 5)                                             |            | Na3                                                                               | Geometry (CN = 7) |                                                              |
| HP-6              |                                                                    | 26.359  | 27.495                                              | 34.288   | PP-5                                                          |            | 18.038                                                                            | HP-7              |                                                              |
| PPY-6             |                                                                    | 12.386  | 12.507                                              | 16.956   | vOC-5                                                         |            | 5.122                                                                             | HPY-7             |                                                              |
| OC-6              |                                                                    | 8.447   | 8.638                                               | 7.886    | TBPY-5                                                        |            | 8.825                                                                             | PBPY-7            |                                                              |
| TPR-6             |                                                                    | 8.871   | 7.109                                               | 8.880    | SPY-5                                                         |            | 5.402                                                                             | COC-7             |                                                              |
| JPPY-6            |                                                                    | 15.606  | 15.995                                              | 20.965   | JTBPY-5                                                       |            | 11.374                                                                            | CTPR-7            |                                                              |
|                   |                                                                    |         |                                                     |          |                                                               |            |                                                                                   | JPBPY-7           |                                                              |
|                   |                                                                    |         |                                                     |          |                                                               |            |                                                                                   | JETPY-7           |                                                              |
| Lable             | Shape                                                              | Lable   | Shape                                               | Lable    | Shape                                                         | Lable      | Shape                                                                             | Lable             | Shape                                                        |
| PP-5              | Pentagon (D <sub>5h</sub> )                                        | JPPY-6  | Johnson pentagonal pyramid (C <sub>5v</sub> )       | HPY-8    | Heptagonal pyramid (C <sub>7v</sub> )                         | JSD-8      | Snub diphenoid J84 (D <sub>2d</sub> )                                             | JMBIC-10          | Metabidiminished icosahedron (J62) (C <sub>2v</sub> )        |
| vOC-5             | Vacant octahedron‡ (Johnson square pyramid, J1) (C <sub>4v</sub> ) | HP-7    | Heptagon                                            | HBPY-8   | Hexagonal bipyramid (D <sub>6h</sub> )                        | TT-8       | Triakis tetrahedron (T <sub>d</sub> )                                             | JATDI-10          | Augmented tridiminished icosahedron (J64) (C <sub>3v</sub> ) |
| TBPY-5            | Trigonal bipyramid (D <sub>3h</sub> )                              | HPY-7   | Hexagonal pyramid (C <sub>6v</sub> )                | CU-8     | Cube (O <sub>h</sub> )                                        | DP-10      | Decagon (D <sub>10h</sub> )                                                       | JSPC-10           | Sphenocorona (J87) (C <sub>2v</sub> )                        |
| SPY-5             | Square pyramid <sup>§</sup> (C <sub>4v</sub> )                     | PBPY-7  | Pentagonal bipyramid (D <sub>5h</sub> )             | SAPR-8   | Square antiprism (D <sub>4d</sub> )                           | EPY-10     | Enneagonal pyramid (C <sub>9v</sub> )                                             | SDD-10            | Staggered dodecahedron (2:6:2) # (D <sub>2</sub> )           |
| JTBPY-5           | Johnson trigonal bipyramid (J12) (D <sub>3h</sub> )                | COC-7   | Capped octahedron (C <sub>3v</sub> )                | TDD-8    | Triangular dodecahedron (D <sub>2d</sub> )                    | OBPY-10    | Octagonal bipyramid (D <sub>8h</sub> )                                            | TD-10             | Tetradecahedron (2:6:2) (C <sub>3v</sub> )                   |
| HP-6              | Hexagon (D <sub>6h</sub> )                                         | CTPR-7  | Capped trigonal prism (C <sub>2v</sub> )            | JGBF-8   | Johnson gyrobiafastigium J26 (D <sub>2d</sub> )               | PPR-10     | Pentagonal prism (D <sub>5h</sub> )                                               | HD-10             | Hexadecahedron (2:6:2, or 1:4:4:1) (D <sub>4h</sub> )        |
| PPY-6             | Pentagonal pyramid (C <sub>5v</sub> )                              | JPBPY-7 | Johnson pentagonal bipyramid J13 (D <sub>5h</sub> ) | JETBPY-8 | Johnson elongated triangular bipyramid J14 (D <sub>3h</sub> ) | PAPR-10    | Pentagonal antiprism (D <sub>5d</sub> )                                           |                   |                                                              |
| OC-6              | Octahedron (O <sub>h</sub> )                                       | JETPY-7 | Elongated triangular pyramid J7 (C <sub>3v</sub> )  | JBTPR-8  | Biaugmented trigonal prism J50 (C <sub>2v</sub> )             | JBCCU-10   | Bicapped cube (Elongated square bipyramid J15) (D <sub>4h</sub> )                 |                   |                                                              |
| TPR-6             | Trigonal prism (D <sub>3h</sub> )                                  | OP-8    | Octagon (D <sub>8h</sub> )                          | BTPR-8   | Biaugmented trigonal prism (C <sub>2v</sub> )                 | JBCSAPR-10 | Bicapped square antiprism (Gyroelongated square bipyramid J17) (D <sub>4d</sub> ) |                   |                                                              |

**Table S6.** Dy<sup>III</sup> and Na<sup>I</sup> geometry analysis of **2** by SHAPE 2.1 software.

| Dy                |                                         |         |                                                     |                   |                                        |          |                                                               |         |                                                   |
|-------------------|-----------------------------------------|---------|-----------------------------------------------------|-------------------|----------------------------------------|----------|---------------------------------------------------------------|---------|---------------------------------------------------|
| Geometry (CN = 7) | Dy1                                     | Dy4     | Dy5                                                 | Geometry (CN = 8) | Dy2                                    | Dy3      | Dy6                                                           | Dy7     | Dy8                                               |
| HP-7              | 35.140                                  | 33.262  | 30.045                                              | OP-8              | 32.863                                 | 34.037   | 32.526                                                        | 29.539  | 32.257                                            |
| HPY-7             | 19.787                                  | 23.957  | 22.079                                              | HPY-8             | 23.889                                 | 23.451   | 23.807                                                        | 20.769  | 23.056                                            |
| PBPY-7            | 4.526                                   | 0.358   | 2.156                                               | HBPY-8            | 15.735                                 | 15.840   | 15.359                                                        | 10.740  | 15.858                                            |
| COC-7             | 2.285                                   | 7.096   | 3.866                                               | CU-8              | 12.397                                 | 12.223   | 12.212                                                        | 12.137  | 11.049                                            |
| CTPR-7            | 1.462                                   | 5.262   | 2.228                                               | SAPR-8            | 3.183                                  | 3.668    | 3.146                                                         | 6.316   | 3.462                                             |
| JPBPY-7           | 8.185                                   | 3.336   | 4.986                                               | TDD-8             | 2.379                                  | 2.515    | 2.184                                                         | 5.059   | 1.990                                             |
| JETPY-7           | 20.286                                  | 22.968  | 20.255                                              | JGBF-8            | 14.038                                 | 13.728   | 13.488                                                        | 7.332   | 13.413                                            |
|                   |                                         |         |                                                     | JETBPY-8          | 28.107                                 | 28.080   | 28.195                                                        | 20.574  | 27.329                                            |
|                   |                                         |         |                                                     | JBTPR-8           | 2.721                                  | 3.138    | 2.720                                                         | 3.891   | 2.892                                             |
|                   |                                         |         |                                                     | BTPR-8            | 2.195                                  | 2.541    | 2.135                                                         | 3.892   | 2.424                                             |
|                   |                                         |         |                                                     | JSD-8             | 4.441                                  | 4.662    | 4.161                                                         | 4.432   | 4.067                                             |
|                   |                                         |         |                                                     | TT-8              | 13.141                                 | 13.012   | 12.903                                                        | 12.695  | 11.606                                            |
|                   |                                         |         |                                                     | ETBPY-8           | 24.918                                 | 24.641   | 24.854                                                        | 17.863  | 23.820                                            |
| Na                |                                         |         |                                                     |                   |                                        |          |                                                               |         |                                                   |
| Geometry (CN = 7) | Na1                                     |         | Na2                                                 |                   | Na3                                    |          | Na4                                                           |         |                                                   |
| HP-7              | 30.889                                  |         | 31.509                                              |                   | 32.008                                 |          | 29.778                                                        |         |                                                   |
| HPY-7             | 15.241                                  |         | 21.702                                              |                   | 21.498                                 |          | 15.571                                                        |         |                                                   |
| PBPY-7            | 6.061                                   |         | 2.851                                               |                   | 2.381                                  |          | 4.913                                                         |         |                                                   |
| COC-7             | 5.580                                   |         | 5.065                                               |                   | 5.748                                  |          | 5.567                                                         |         |                                                   |
| CTPR-7            | 4.625                                   |         | 3.240                                               |                   | 4.420                                  |          | 4.760                                                         |         |                                                   |
| JPBPY-7           | 8.505                                   |         | 7.280                                               |                   | 7.153                                  |          | 7.080                                                         |         |                                                   |
| JETPY-7           | 16.747                                  |         | 19.396                                              |                   | 20.232                                 |          | 16.235                                                        |         |                                                   |
| Lable             | Shape                                   | Lable   | Shape                                               | Lable             | Shape                                  | Lable    | Shape                                                         | Lable   | Shape                                             |
| HP-7              | Heptagon                                | CTPR-7  | Capped trigonal prism (C <sub>2v</sub> )            | OP-8              | Octagon (D <sub>8h</sub> )             | SAPR-8   | Square antiprism (D <sub>4d</sub> )                           | JBTPR-8 | Biaugmented trigonal prism J50 (C <sub>2v</sub> ) |
| HPY-7             | Hexagonal pyramid (C <sub>6v</sub> )    | JPBPY-7 | Johnson pentagonal bipyramid J13 (D <sub>5h</sub> ) | HPY-8             | Heptagonal pyramid (C <sub>7v</sub> )  | TDD-8    | Triangular dodecahedron (D <sub>2d</sub> )                    | BTPR-8  | Biaugmented trigonal prism (C <sub>2v</sub> )     |
| PBPY-7            | Pentagonal bipyramid (D <sub>5h</sub> ) | JETPY-7 | Elongated triangular pyramid J7 (C <sub>3v</sub> )  | HBPY-8            | Hexagonal bipyramid (D <sub>6h</sub> ) | JGBF-8   | Johnson gyrobifastigium J26 (D <sub>2d</sub> )                | JSD-8   | Snub diphenoid J84 (D <sub>2d</sub> )             |
| COC-7             | Capped octahedron (C <sub>3v</sub> )    |         |                                                     | CU-8              | Cube (O <sub>h</sub> )                 | JETBPY-8 | Johnson elongated triangular bipyramid J14 (D <sub>3h</sub> ) | TT-8    | Triakis tetrahedron (T <sub>d</sub> )             |

**Table S7.** Relaxation fitting parameters from least-squares fitting of  $\chi(\omega)$  data under zero  $dc$  field for **1** (1.0-1000 Hz).

|                     |           | $\text{Ln}(\chi''/\chi')$ |           |           |           |           |           |           |           |
|---------------------|-----------|---------------------------|-----------|-----------|-----------|-----------|-----------|-----------|-----------|
| $T$ (k)<br>$V$ (Hz) | 1.8       | 2.0                       | 2.3       | 2.6       | 2.9       | 3.2       | 3.5       | 3.8       | 4.1       |
| <b>1.000(5)</b>     | -5.049(9) | -5.183(5)                 | -5.263(1) | -5.337(5) | -5.392(8) | -5.429(8) | -5.483(2) | -5.521(4) | -5.546(1) |
| <b>17.193(1)</b>    | -4.972(1) | -5.095(3)                 | -5.196(1) | -5.256(7) | -5.324(5) | -5.382(7) | -5.396(8) | -5.457(1) | -5.512(3) |
| <b>21.046(6)</b>    | -4.851(4) | -4.989(2)                 | -5.090(6) | -5.162(8) | -5.203(7) | -5.279(4) | -5.314(1) | -5.356(4) | -5.371(2) |
| <b>25.807(6)</b>    | -4.730(7) | -4.854(3)                 | -4.936(5) | -5.014(4) | -5.075(2) | -5.123(9) | -5.166(7) | -5.196(3) | -5.239(1) |
| <b>31.624(4)</b>    | -4.608(9) | -4.728(7)                 | -4.809(6) | -4.876(2) | -4.939(8) | -4.979(1) | -5.010(6) | -5.067(2) | -5.096(8) |
| <b>38.752(4)</b>    | -4.507(2) | -4.621(7)                 | -4.702(2) | -4.782(4) | -4.834(2) | -4.880(2) | -4.931(8) | -4.962(2) | -5.001(1) |
| <b>47.498(1)</b>    | -4.436(7) | -4.549(9)                 | -4.643(6) | -4.717(8) | -4.766(5) | -4.811(1) | -4.869(6) | -4.899(5) | -4.927(1) |
| <b>58.128(7)</b>    | -4.369(8) | -4.492(1)                 | -4.581(4) | -4.648(8) | -4.722(1) | -4.768(1) | -4.807(1) | -4.855(6) | -4.898(9) |
| <b>71.178(1)</b>    | -4.302(2) | -4.423(6)                 | -4.513(1) | -4.589(7) | -4.649(4) | -4.703(1) | -4.754(1) | -4.792(1) | -4.839(1) |
| <b>87.349(1)</b>    | -4.202(2) | -4.326(9)                 | -4.424(5) | -4.501(9) | -4.566(9) | -4.617(2) | -4.658(9) | -4.703(6) | -4.743(1) |
| <b>107.079(2)</b>   | -4.095(6) | -4.216(8)                 | -4.314(4) | -4.390(6) | -4.452(5) | -4.509(4) | -4.549(1) | -4.591(1) | -4.626(8) |
| <b>130.906(4)</b>   | -3.978(2) | -4.103(3)                 | -4.192(2) | -4.263(9) | -4.330(1) | -4.381(1) | -4.428(1) | -4.464(9) | -4.505(9) |
| <b>160.618(8)</b>   | -3.860(7) | -3.982(1)                 | -4.070(7) | -4.138(5) | -4.201(8) | -4.257(1) | -4.292(9) | -4.333(2) | -4.366(2) |
| <b>196.887(6)</b>   | -3.748(5) | -3.872(1)                 | -3.961(6) | -4.026(7) | -4.088(7) | -4.136(9) | -4.178(1) | -4.214(1) | -4.249(1) |
| <b>241.126(5)</b>   | -3.647(1) | -3.772(4)                 | -3.856(4) | -3.923(8) | -3.985(4) | -4.037(3) | -4.074(5) | -4.110(4) | -4.141(7) |
| <b>295.480(3)</b>   | -3.553(4) | -3.675(3)                 | -3.766(6) | -3.845(6) | -3.897(8) | -3.950(1) | -3.983(1) | -4.020(9) | -4.056(1) |
| <b>362.360(8)</b>   | -3.462(8) | -3.586(2)                 | -3.683(6) | -3.753(9) | -3.809(9) | -3.864(8) | -3.906(7) | -3.938(2) | -3.972(6) |
| <b>443.892(1)</b>   | -3.375(4) | -3.504(1)                 | -3.595(4) | -3.679(1) | -3.731(5) | -3.785(9) | -3.826(8) | -3.861(6) | -3.896(6) |
| <b>544.045(9)</b>   | -3.287(3) | -3.422(8)                 | -3.518(3) | -3.594(6) | -3.658(5) | -3.708(4) | -3.750(7) | -3.784(9) | -3.817(2) |
| <b>666.595(5)</b>   | -3.203(8) | -3.338(6)                 | -3.435(2) | -3.514(5) | -3.574(2) | -3.620(6) | -3.662(6) | -3.697(1) | -3.734(1) |
| <b>815.501(1)</b>   | -3.129(4) | -3.266(1)                 | -3.366(5) | -3.449(9) | -3.513(2) | -3.567(5) | -3.607(2) | -3.635(9) | -3.682(1) |
| <b>999.040(9)</b>   | -3.076(2) | -3.219(6)                 | -3.322(1) | -3.407(1) | -3.469(2) | -3.522(1) | -3.564(6) | -3.601(6) | -3.632(4) |



**Table S8.** Relaxation fitting parameters from least-squares fitting of  $\chi(\omega)$  data under zero *dc* field for **1** (10-10000 Hz).

| <i>T</i> | $\chi_r$  | $\chi_s$  | $\alpha$ | $\tau / s$  |
|----------|-----------|-----------|----------|-------------|
| 1.9      | 63.710(2) | 36.288(3) | 0.320(9) | 1.995(9)E-5 |
| 2.5      | 60.250(7) | 39.749(2) | 0.299(7) | 1.862(1)E-5 |
| 3.0      | 58.435(3) | 41.564(6) | 0.291(9) | 1.707(1)E-5 |
| 3.5      | 56.968(1) | 43.031(9) | 0.282(9) | 1.621(3)E-5 |
| 4.0      | 55.808(6) | 44.191(3) | 0.271(9) | 1.586(6)E-5 |
| 4.5      | 55.190(7) | 44.809(2) | 0.287(6) | 1.484(7)E-5 |
| 5.0      | 54.155(5) | 45.844(4) | 0.255(3) | 1.416(2)E-5 |
| 7.0      | 51.908(5) | 47.091(4) | 0.242(7) | 1.216(9)E-5 |
| 8.0      | 50.385(1) | 48.614(8) | 0.221(1) | 1.081(2)E-5 |
| 9.0      | 48.834(5) | 50.165(4) | 0.206(8) | 9.622(2)E-6 |
| 10.0     | 46.148(8) | 52.148(8) | 0.191(3) | 9.046(1)E-6 |
| 11.0     | 44.690(7) | 53.690(7) | 0.179(1) | 8.377(6)E-6 |
| 12.0     | 42.359(1) | 54.640(9) | 0.169(1) | 7.375(1)E-6 |
| 13.0     | 40.385(4) | 56.034(7) | 0.151(6) | 6.238(5)E-6 |
| 14.0     | 38.680(8) | 58.059(2) | 0.144(9) | 5.411(7)E-6 |
| 15.0     | 36.561(5) | 60.084(7) | 0.128(4) | 4.058(1)E-6 |
| 16.0     | 34.768(2) | 61.809(2) | 0.118(6) | 3.112(8)E-6 |
| 17.0     | 32.757(3) | 63.127(9) | 0.106(9) | 2.861(2)E-6 |
| 18.0     | 31.647(3) | 64.182(4) | 0.083(3) | 2.346(1)E-6 |
| 19.0     | 30.013(6) | 65.187(1) | 0.073(6) | 2.088(1)E-6 |
| 20.0     | 28.761(1) | 66.152(8) | 0.059(6) | 1.954(4)E-6 |

**Table S9.** Relaxation fitting parameters from least-squares fitting of  $\chi(\omega)$  data under zero  $dc$  field for **2** (1.0-1000 Hz).

| $T$  | $\chi_r$  | $\chi_s$  | $\alpha$ | $\tau / s$  |
|------|-----------|-----------|----------|-------------|
| 1.8  | 38.146(3) | 23.853(6) | 0.229(1) | 1.185(1)E-4 |
| 2.0  | 36.780(1) | 25.219(9) | 0.219(1) | 1.051(1)E-4 |
| 2.3  | 35.837(2) | 26.162(8) | 0.212(4) | 8.950(7)E-5 |
| 2.6  | 35.139(7) | 26.860(2) | 0.207(1) | 8.064(9)E-5 |
| 2.9  | 34.564(2) | 27.435(7) | 0.200(2) | 7.532(4)E-5 |
| 3.2  | 34.238(8) | 27.761(1) | 0.202(9) | 6.614(1)E-5 |
| 3.5  | 33.865(2) | 28.134(7) | 0.199(3) | 6.272(9)E-5 |
| 4    | 33.533(6) | 28.466(3) | 0.194(3) | 6.058(3)E-5 |
| 4.3  | 33.319(9) | 28.680(1) | 0.194(2) | 5.617(5)E-5 |
| 4.6  | 32.927(5) | 29.072(4) | 0.189(8) | 5.269(7)E-5 |
| 4.9  | 32.787(1) | 29.212(9) | 0.197(2) | 4.491(1)E-5 |
| 5.5  | 32.600(3) | 29.399(7) | 0.199(5) | 3.885(4)E-5 |
| 6.0  | 32.424(7) | 29.575(2) | 0.199(1) | 3.422(4)E-5 |
| 6.5  | 32.239(1) | 29.760(8) | 0.196(5) | 2.876(4)E-5 |
| 7.0  | 32.516(1) | 29.483(9) | 0.213(8) | 2.222(1)E-5 |
| 7.5  | 32.206(6) | 29.793(3) | 0.198(3) | 1.735(6)E-5 |
| 8.0  | 32.308(8) | 29.691(1) | 0.204(5) | 1.397(2)E-5 |
| 8.5  | 32.316(6) | 29.683(3) | 0.203(3) | 1.164(6)E-5 |
| 9.0  | 32.234(5) | 29.765(4) | 0.189(3) | 9.352(8)E-6 |
| 10.0 | 31.719(7) | 29.480(2) | 0.126(5) | 7.063(4)E-6 |
| 11.0 | 31.558(7) | 29.241(2) | 0.167(9) | 6.014(5)E-6 |
| 12.0 | 31.492(5) | 30.507(4) | 0.099(9) | 5.079(5)E-6 |
| 13.0 | 31.421(5) | 30.578(4) | 0.083(8) | 4.659(6)E-6 |
| 14.0 | 35.771(4) | 26.228(5) | 0.115(3) | 4.026(2)E-6 |
| 15.0 | 35.687(8) | 26.312(1) | 0.102(3) | 3.530(7)E-6 |
| 16.0 | 35.783(5) | 26.216(4) | 0.071(9) | 3.005(9)E-6 |
| 17.0 | 35.672(7) | 26.327(2) | 0.067(7) | 2.665(2)E-6 |
| 18.0 | 35.457(1) | 26.542(9) | 0.076(6) | 2.310(7)E-6 |
| 19.0 | 35.322(8) | 26.677(2) | 0.080(4) | 2.036(1)E-6 |
| 20.0 | 35.733(3) | 26.266(6) | 0.038(5) | 1.813(3)E-6 |

**Table S10.** Relaxation fitting parameters from least-squares fitting of  $\chi(\omega)$  data under zero  $dc$  field for **2** (10-10000 Hz).

| $T$  | $\chi_r$  | $\chi_s$  | $\alpha$ | $\tau / s$  |
|------|-----------|-----------|----------|-------------|
| 1.9  | 69.004(4) | 30.995(5) | 0.312(1) | 5.847(2)E-5 |
| 2.5  | 63.456(8) | 36.543(1) | 0.293(1) | 3.911(3)E-5 |
| 3.0  | 60.665(1) | 39.334(8) | 0.283(7) | 3.129(7)E-5 |
| 3.5  | 58.692(2) | 41.307(7) | 0.277(7) | 2.649(7)E-5 |
| 4.0  | 57.146(2) | 42.853(7) | 0.265(1) | 2.325(4)E-5 |
| 4.5  | 56.006(3) | 43.993(7) | 0.259(1) | 2.049(3)E-5 |
| 5.0  | 55.230(3) | 44.769(6) | 0.266(1) | 1.736(5)E-5 |
| 7.0  | 54.071(3) | 45.928(6) | 0.278(1) | 1.218(6)E-5 |
| 8.0  | 53.060(1) | 46.939(8) | 0.268(4) | 9.450(6)E-6 |
| 9.0  | 52.130(6) | 47.869(3) | 0.240(6) | 8.342(4)E-6 |
| 10.0 | 51.584(2) | 48.415(7) | 0.234(2) | 7.528(6)E-6 |
| 11.0 | 51.037(1) | 48.962(9) | 0.193(2) | 6.331(5)E-6 |
| 12.0 | 51.693(8) | 48.306(1) | 0.312(6) | 5.252(4)E-6 |
| 13.0 | 50.957(3) | 49.042(6) | 0.263(9) | 3.874(5)E-6 |
| 14.0 | 51.494(7) | 48.505(2) | 0.289(5) | 2.879(3)E-7 |
| 15.0 | 50.421(4) | 49.578(5) | 0.192(1) | 2.429(4)E-6 |
| 16.0 | 50.275(2) | 49.724(7) | 0.192(9) | 1.831(6)E-6 |
| 17.0 | 50.347(9) | 49.652(1) | 0.408(6) | 1.360(2)E-6 |
| 18.0 | 50.309(7) | 49.690(2) | 0.669(5) | 1.005(1)E-6 |
| 19.0 | 50.099(9) | 49.900(1) | 0.210(3) | 8.169(1)E-7 |
| 20.0 | 50.052(5) | 49.947(4) | 0.193(3) | 6.166(5)E-7 |

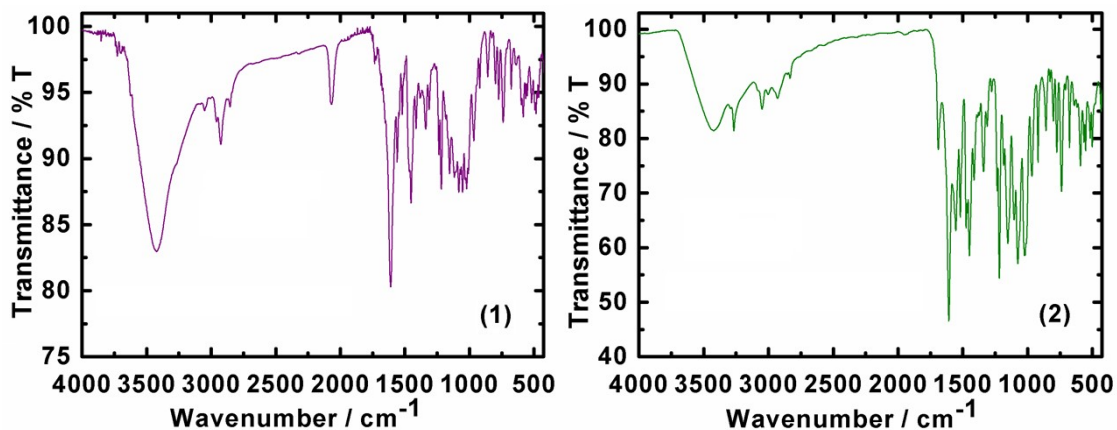

Figure S1. Infrared spectra of 1 (left) and 2 (right).

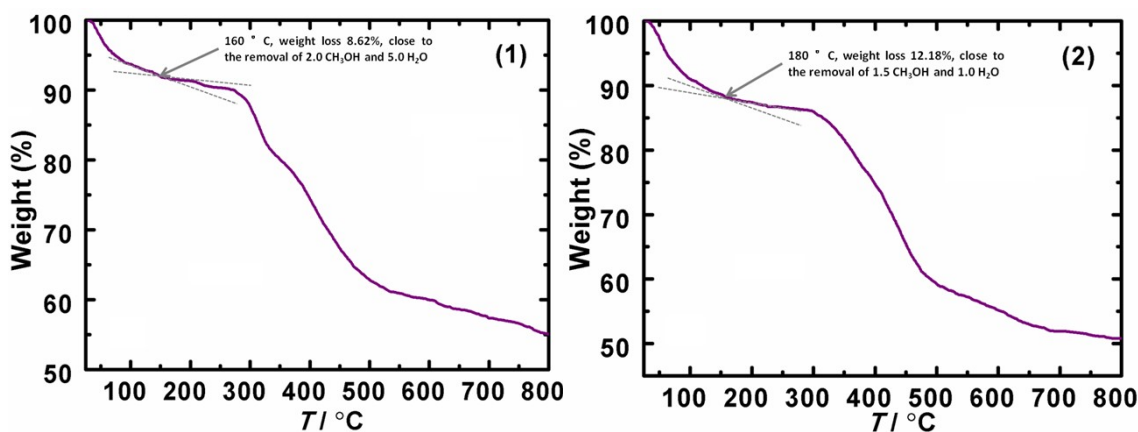

Figure S2. TG analyses of 1 (left) and 2 (right).

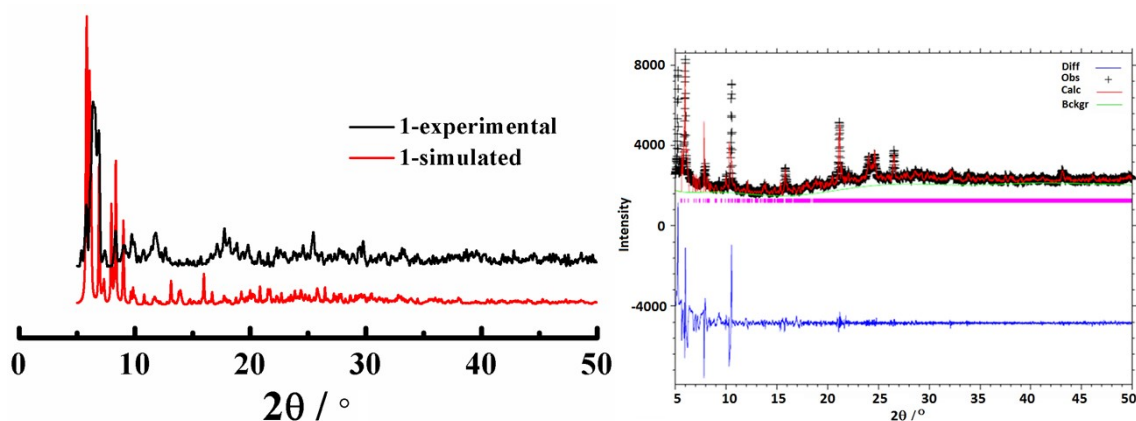

Figure S3. Left: the powder XRD patterns for compound 1. Right: the black circles are for the observed data. The red solid line is for the calculated data. The grey solid curve is for the difference. The vertical bars are the positions of Bragg peaks. Cell parameters:  $P-1$ ,  $a = 15.19 \text{ \AA}$ ,  $b = 19.96 \text{ \AA}$ ,  $c = 26.24 \text{ \AA}$ ,  $\alpha = 89.5^\circ$ ,  $\beta = 79.02^\circ$ ,  $\gamma = 84.28^\circ$ ,  $V = 7356.6 \text{ \AA}^3$  ( $wRp = 0.114$ ).

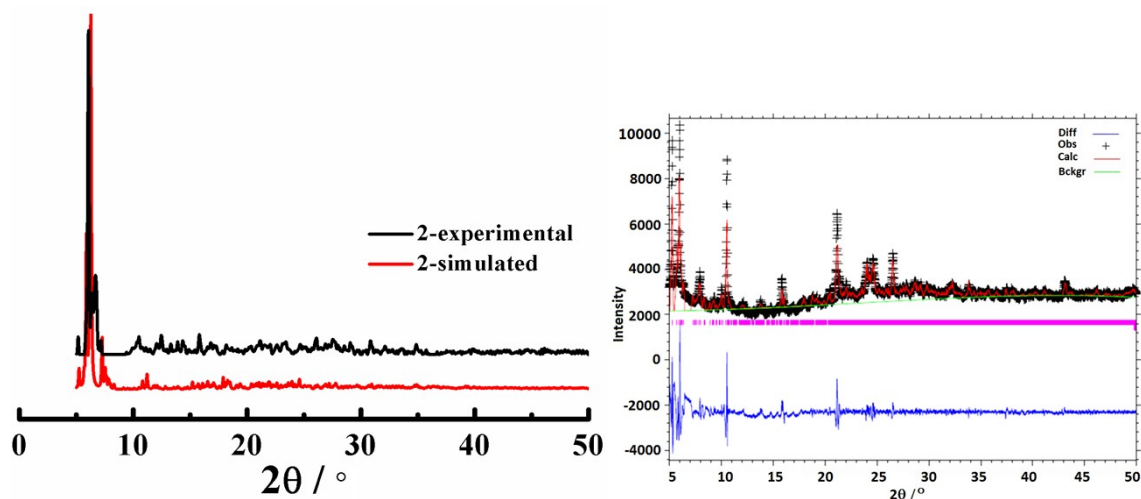

**Figure S4.** Left: the powder XRD patterns for compound **2**. Right: the black circles are for the observed data. The red solid line is for the calculated data. The grey solid curve is for the difference. The vertical bars are the positions of Bragg peaks. Cell parameters:  $P2_1/c$ ,  $a = 32.55 \text{ \AA}$ ,  $b = 16.45 \text{ \AA}$ ,  $c = 33.81 \text{ \AA}$ ,  $\beta = 113.8^\circ$ ,  $V = 16355.1 \text{ \AA}^3$  ( $wRp = 0.069$ ).

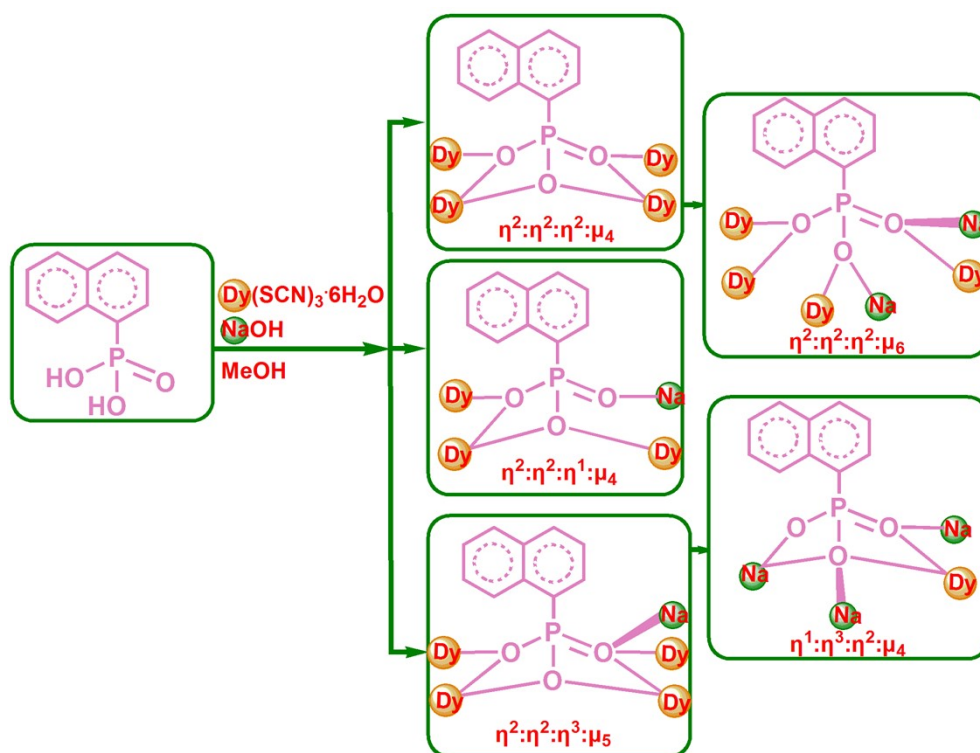

**Scheme S1.**  $\text{H}_2\text{opch}$ , di-deprotonated  $\text{opch}^{2-}$  and corresponding coordination mode in **1**.

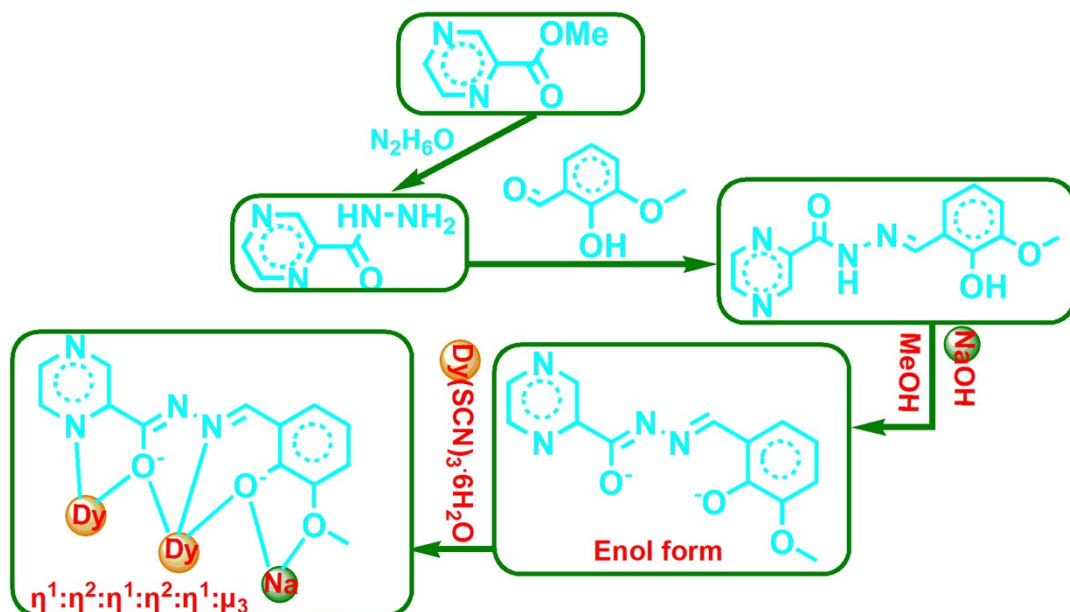

Scheme S2.  $\text{H}_2\text{opch}$ , di-deprotonated  $\text{opch}^{2-}$  and corresponding coordination mode in **1**.

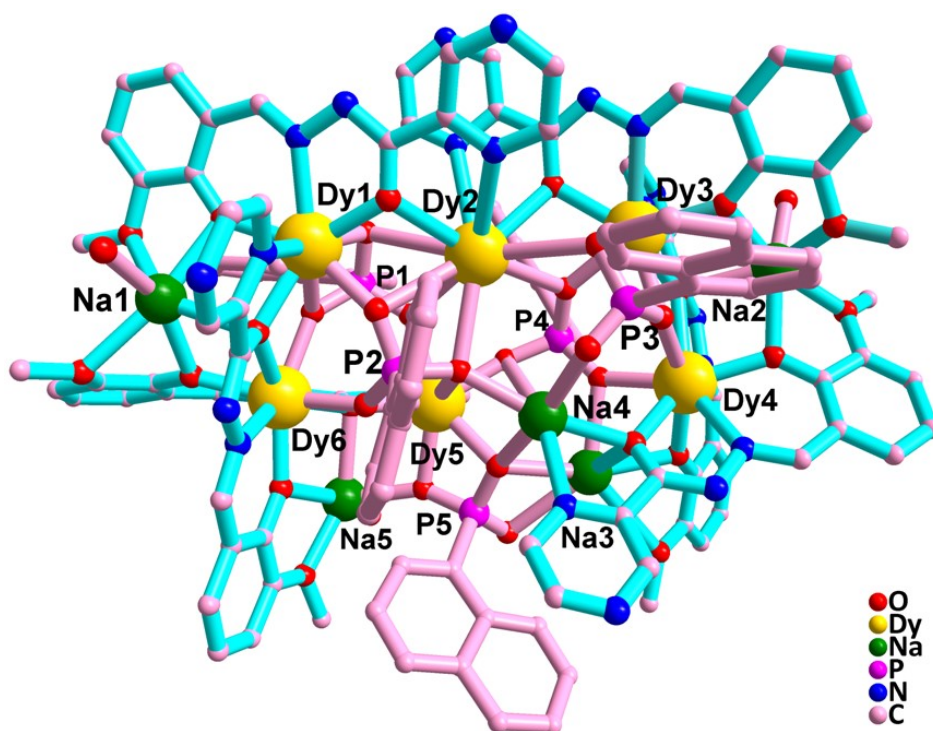

Figure S5. Top-view of **1**. Color scheme: the  $\text{opch}^{2-}$  fragments in turquoise, the  $\text{C}_{10}\text{H}_7\text{PO}_3^{2-}$  fragments in rose, Dy in gold, O in red, N in blue, C in rose, P in pink.

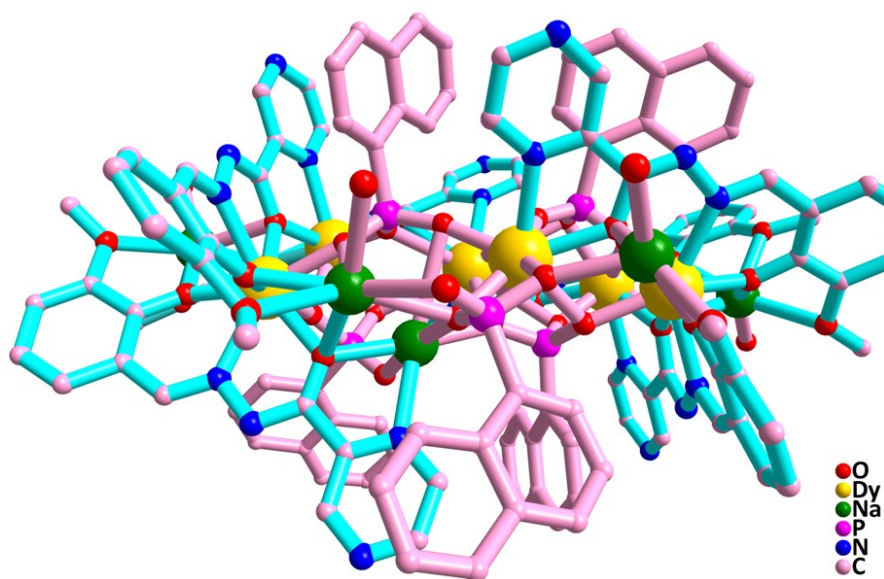

**Figure S6.** Side-view of **1**. Color scheme: the  $\text{opch}^{2-}$  fragments in turquoise, the  $\text{C}_{10}\text{H}_7\text{PO}_3^{2-}$  fragments in rose, Dy in gold, O in red, N in blue, C in rose, P in pink.

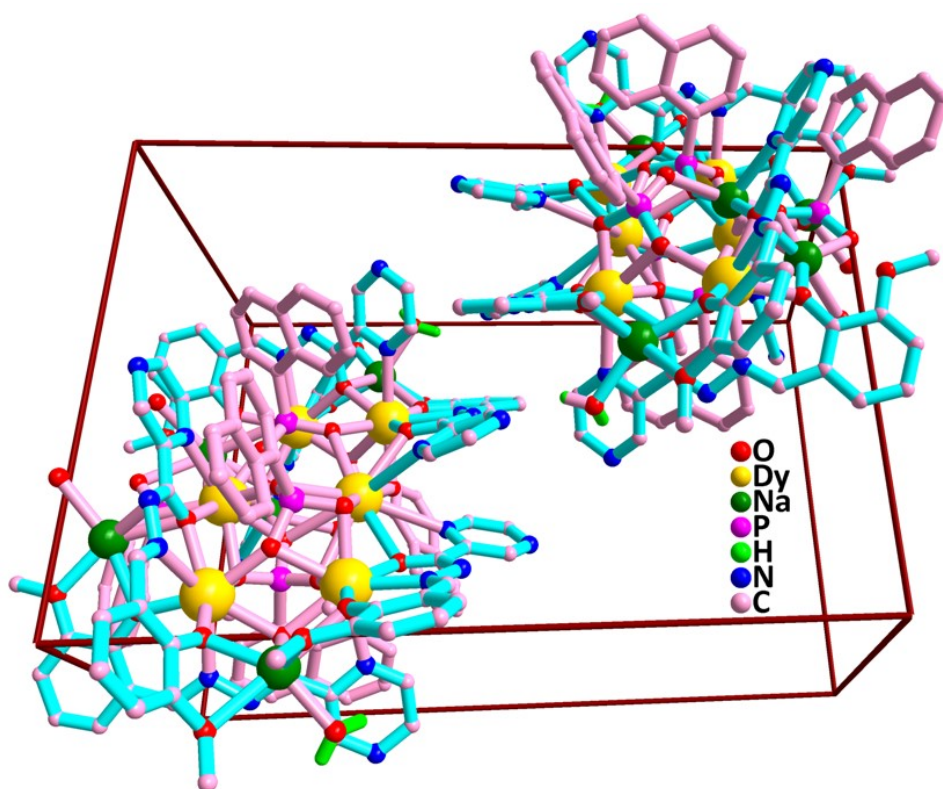

**Figure S7.** Unit cell of **1** showing the presence of two isomers.

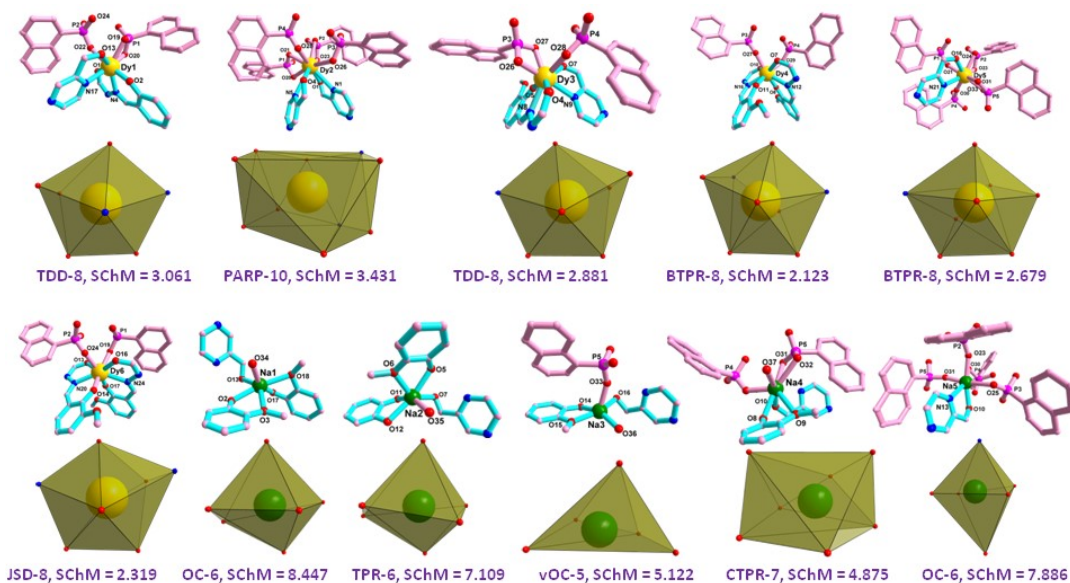

**Figure S8.** Coordination environments of six crystallographically independent Dy<sup>III</sup> ions and five Na<sup>I</sup> ions in **1**. Color scheme: the opch<sup>2-</sup> fragments in turquoise, the C<sub>10</sub>H<sub>7</sub>PO<sub>3</sub><sup>2-</sup> fragments in rose, Dy in gold, O in red, N in blue, C in rose, P in pink.

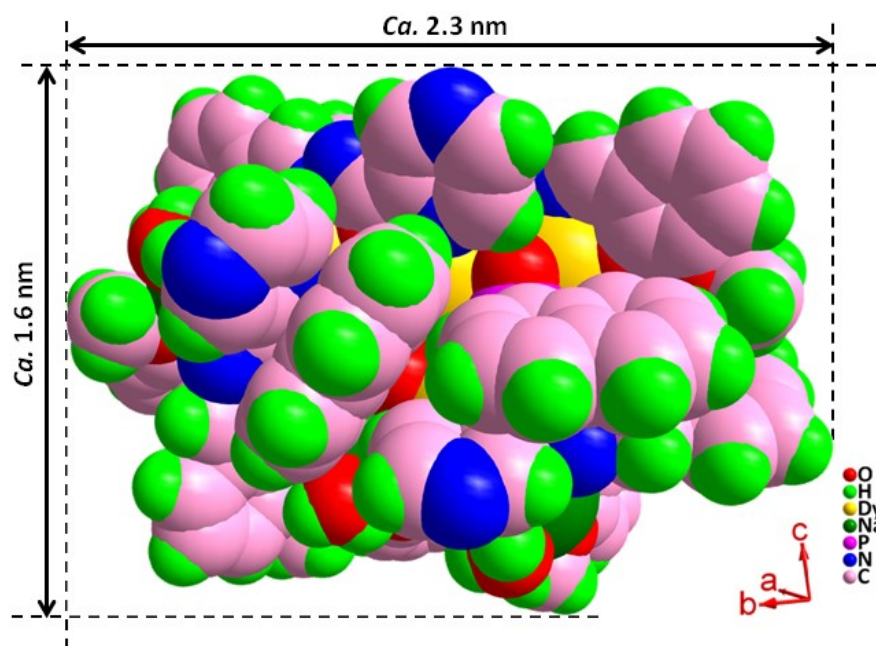

**Figure S9.** Space-filling representation of **1**. Color scheme: Dy in gold, Na in green, O in red, N in blue, P in pink, C in rose, H in bright green.



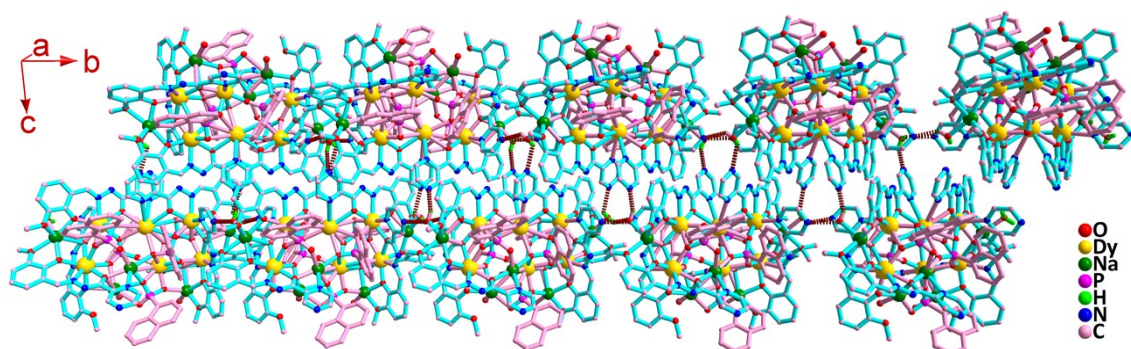

**Figure S10.** Illustration showing the hydrogen-bonding interactions (brown dash lines) and the double-chain supramolecular arrangement of the molecules in **1**.

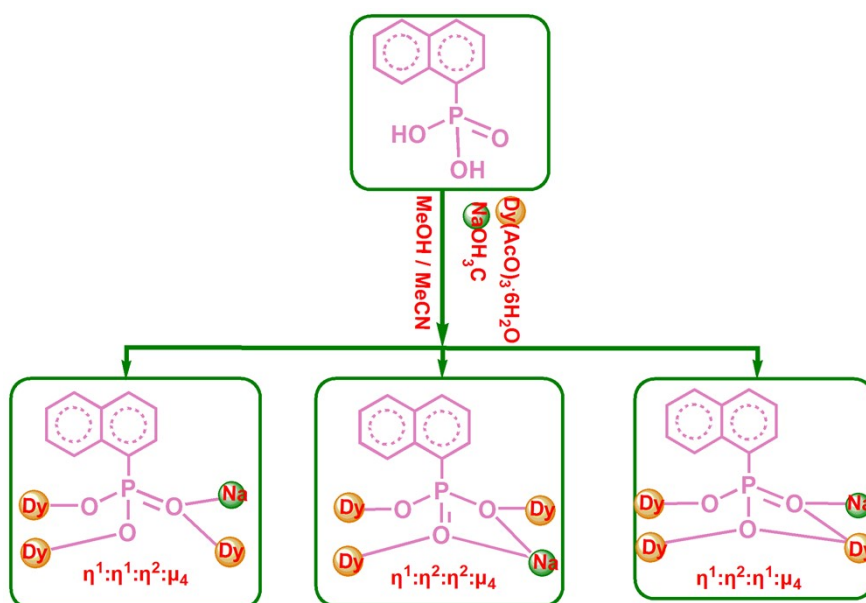

**Scheme S3.**  $\text{H}_2\text{opch}$ , di-deprotonated  $\text{opch}^{2-}$  and corresponding coordination mode in **2**.

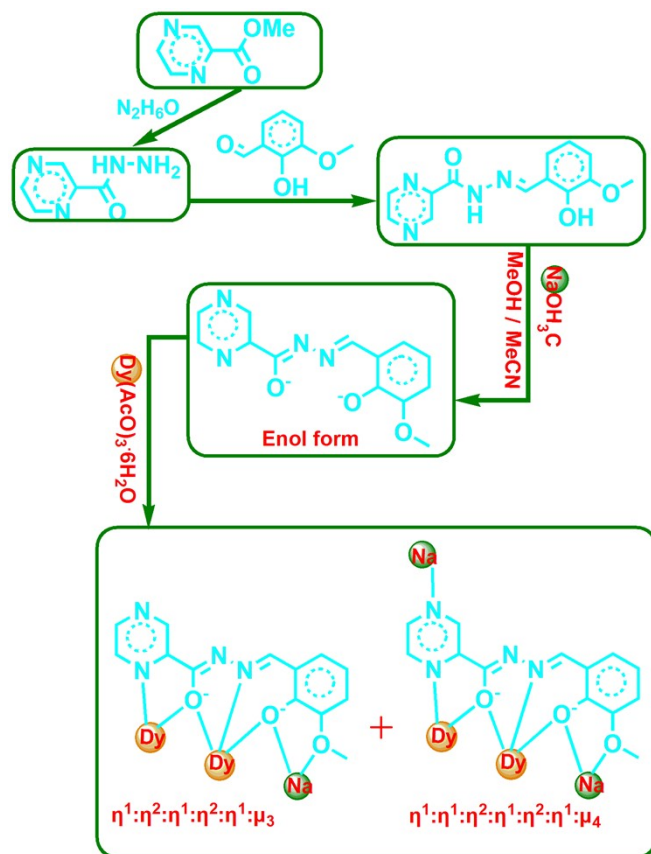

**Scheme S4.**  $\text{H}_2\text{opch}$ , di-deprotonated  $\text{opch}^{2-}$  and corresponding coordination mode in **2**.

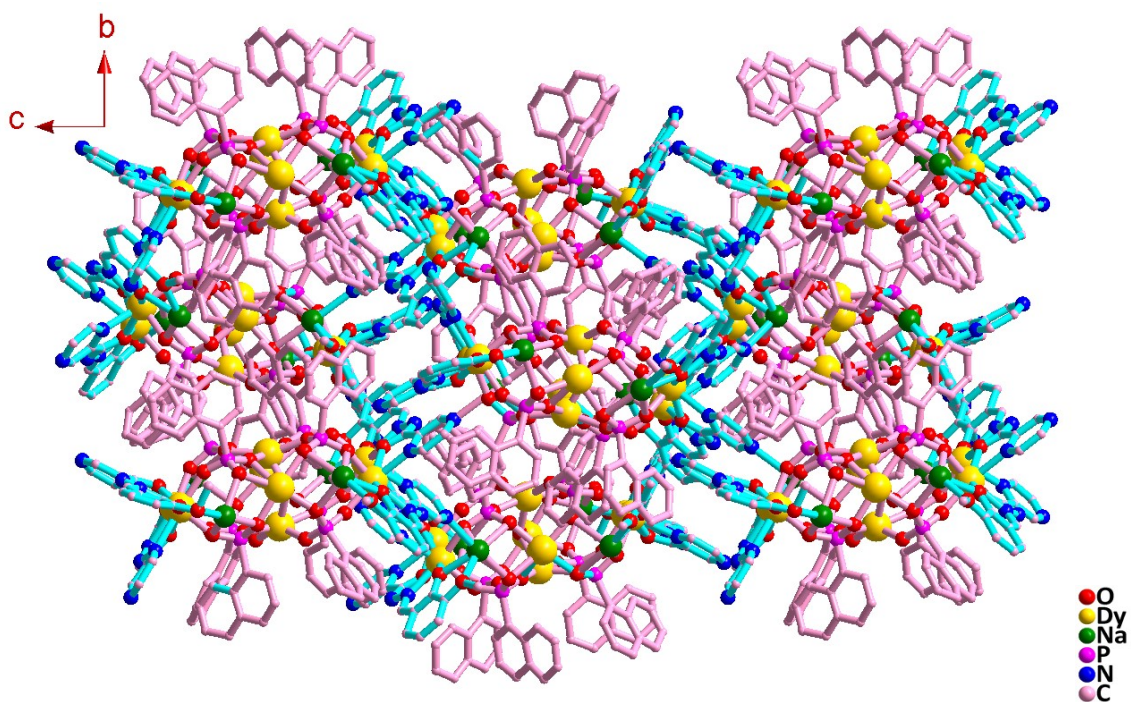

**Figure S11.** Single-crystal structure of **2**. Color scheme: the  $\text{opch}^{2-}$  fragments in turquoise, the  $\text{C}_{10}\text{H}_7\text{PO}_3^{2-}$  fragments in rose, Dy in gold, O in red, N in blue, C in rose, P in pink.

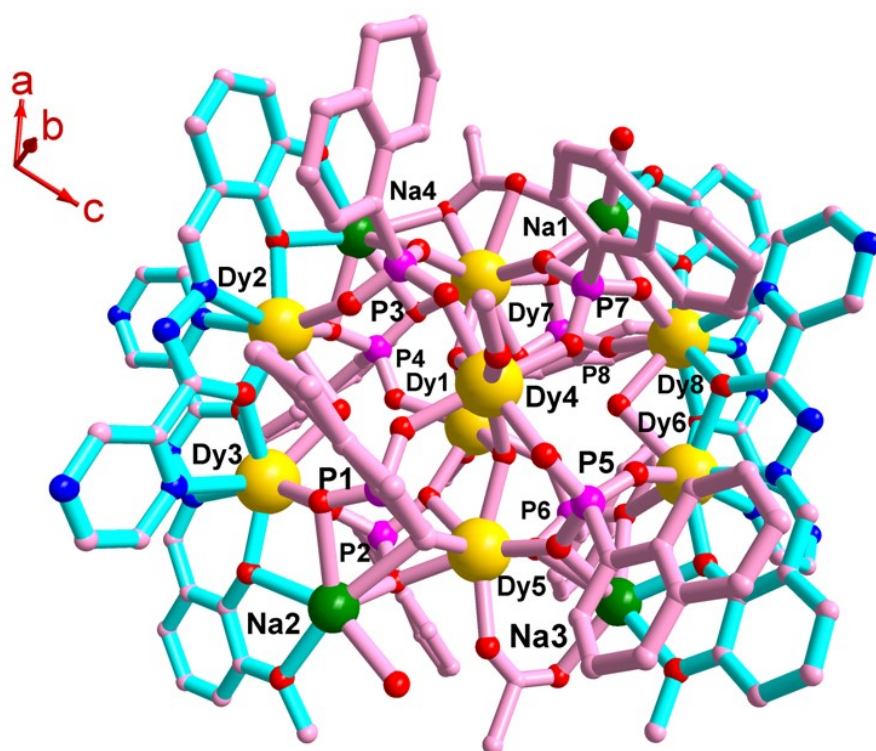

**Figure S12.** Top-view of **2**. Color scheme: the  $\text{opch}^{2-}$  fragments in turquoise, the  $\text{C}_{10}\text{H}_7\text{PO}_3^{2-}$  fragments in rose, Dy in gold, O in red, N in blue, C in rose, P in pink.

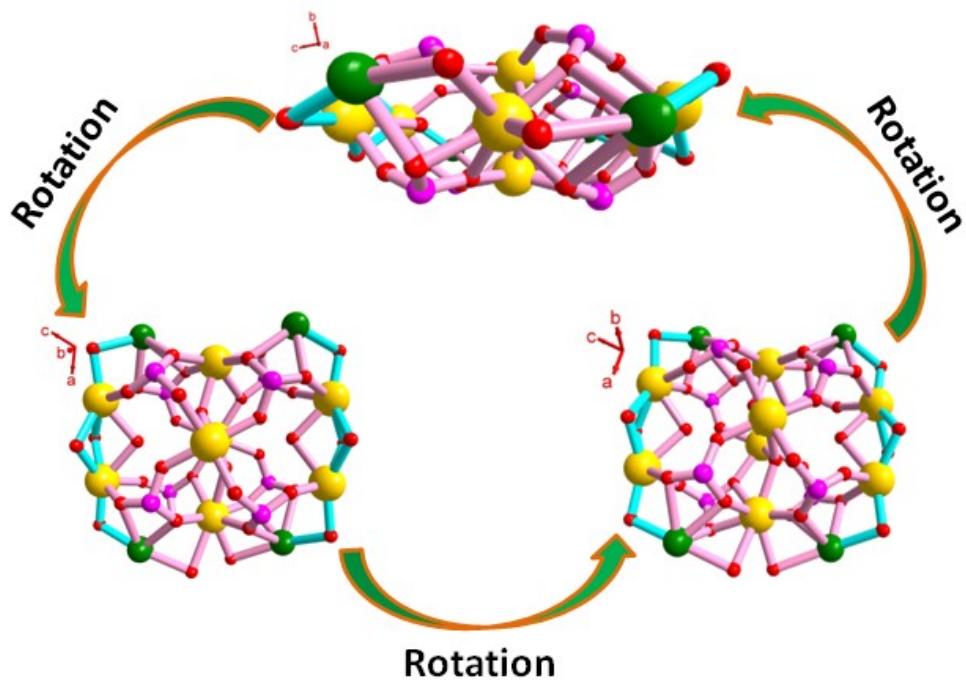

**Figure S13.** Continuous observation of the  $\text{Na}_4\text{Dy}_8$  core from top- to side-view in **2**.

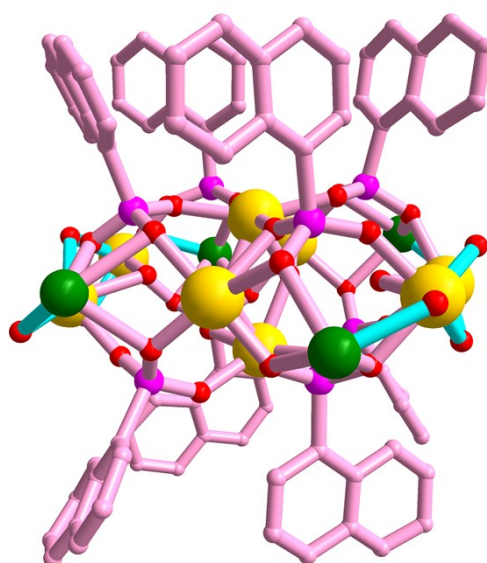

**Figure S14.** The  $[\text{Na}_4\text{Dy}_8(\text{C}_{10}\text{H}_7\text{PO}_3)_8]^{12+}$  core for **2**. Color scheme: the  $\text{C}_{10}\text{H}_7\text{PO}_3^{2-}$  fragments in rose, Dy in gold, O in red, C in rose, P in pink.

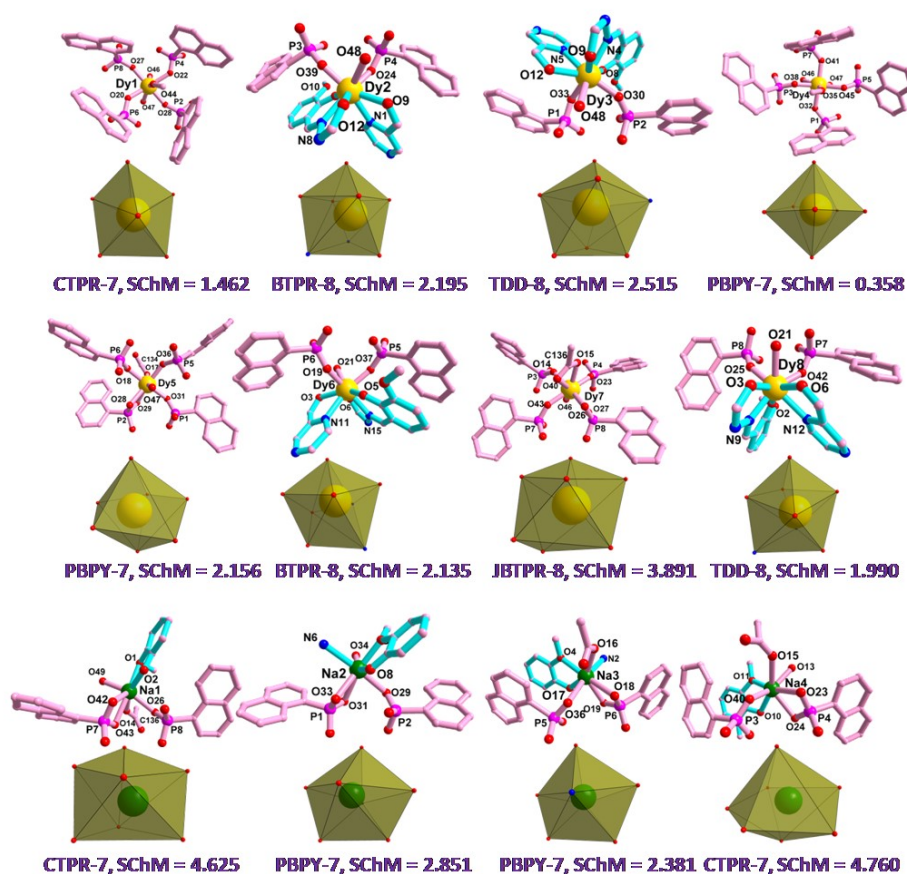

**Figure S15.** Coordination environments of eight crystallographically independent  $\text{Dy}^{\text{III}}$  ions and four  $\text{Na}^{\text{I}}$  ions in **2**. Color scheme: the  $\text{opch}^{2-}$  fragments in turquoise, the  $\text{C}_{10}\text{H}_7\text{PO}_3^{2-}$  fragments in rose, Dy in gold, O in red, N in blue, C in rose, P in pink.

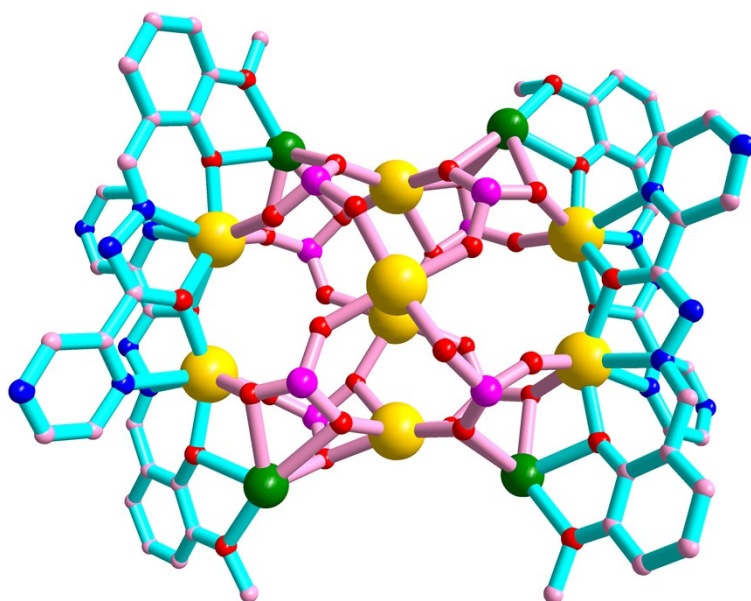

**Figure S16.** The  $[\text{Na}_4\text{Dy}_8(\text{opch})_4(\text{PO}_3)_8]^{4+}$  core for **2**. Color scheme: the opch<sup>2-</sup> fragments in turquoise, the PO<sub>3</sub><sup>2-</sup> fragments in rose, Dy in gold, O in red, N in blue, C in rose, P in pink.

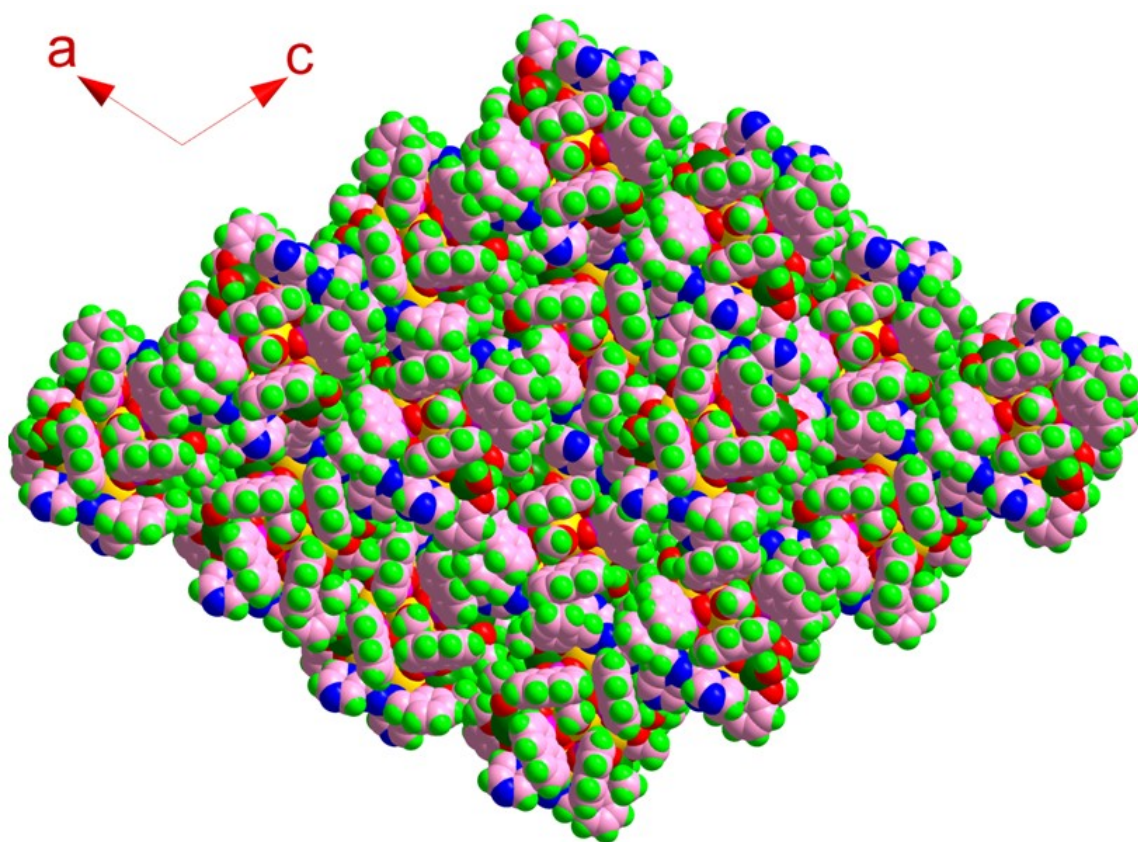

**Figure S17.** Space-filling representation of **2**. Color scheme: Dy in gold, Na in green, O in red, N in blue, P in pink, C in rose, H in bright green.

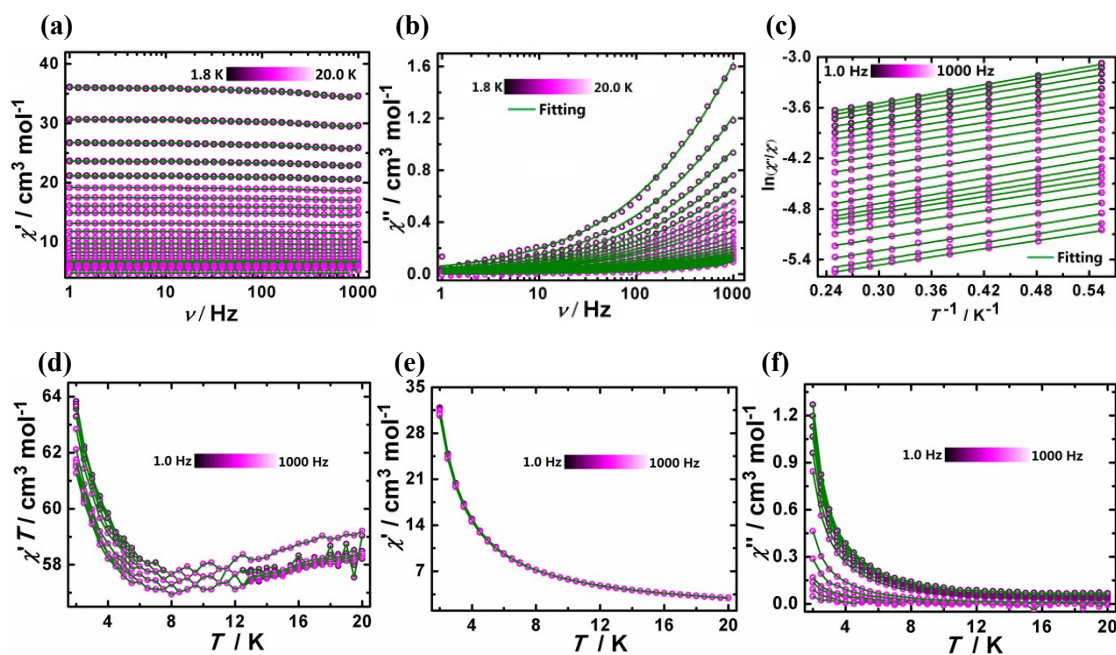

**Figure S18.** Frequency dependence of the  $\chi'$  (a) and  $\chi''$  (b) products, *ac* susceptibilities under zero *dc* field for **1**. The  $\ln(\chi''/\chi')$  versus  $T^{-1}$  plots (c). Temperature dependence of the  $\chi'T$  (d),  $\chi'$  (e) and  $\chi''$  (f) products, *ac* susceptibilities (MPMS3).

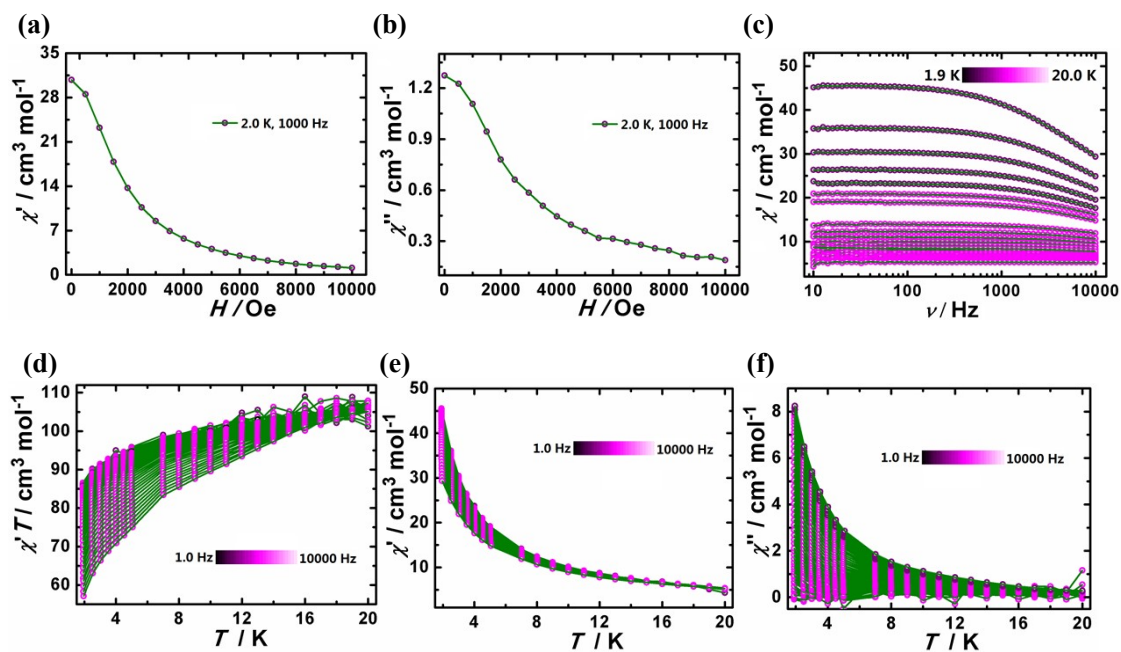

**Figure S19.** Field dependence of the  $\chi'$  (a) and  $\chi''$  (b) products, *ac* susceptibility of **1** at 1000 Hz and 2 K. Frequency dependence of the  $\chi'$  (c) product, *ac* susceptibilities under zero *dc* field. Temperature dependence of the  $\chi'T$  (d),  $\chi'$  (e) and  $\chi''$  (f) products, *ac* susceptibilities (PPMS).

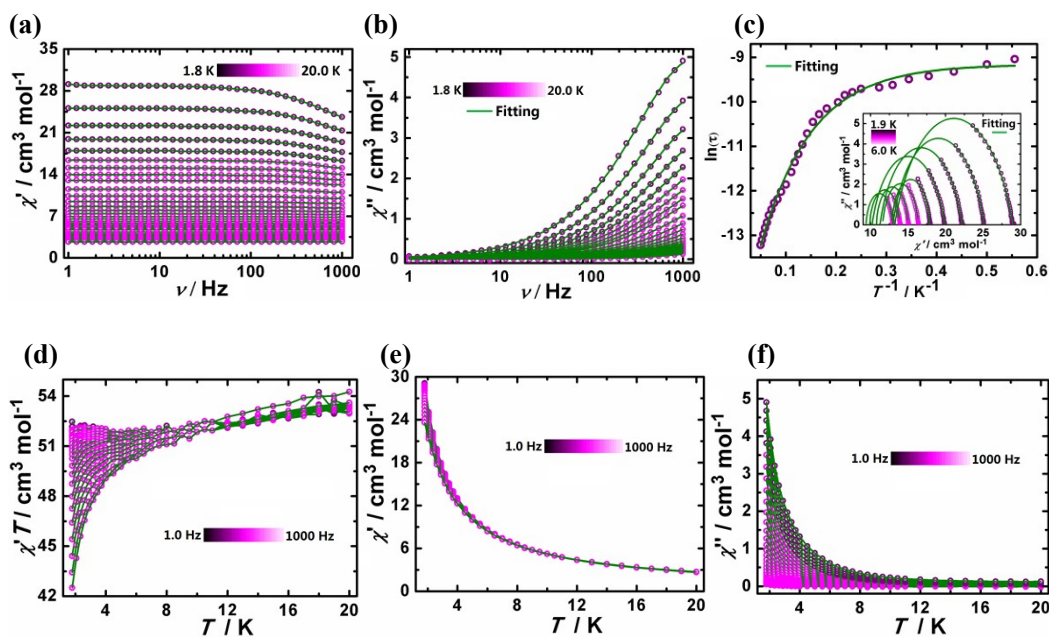

**Figure S20.** Frequency dependence of the  $\chi'$  (a) and  $\chi''$  (b) products,  $ac$  susceptibilities under zero  $dc$  field for **2** (MPMS3). The  $\ln(\tau)$  versus  $T^{-1}$  plots (c). Temperature dependence of the  $\chi'T$  (d),  $\chi'$  (e) and  $\chi''$  (f) products,  $ac$  susceptibilities (PPMS).

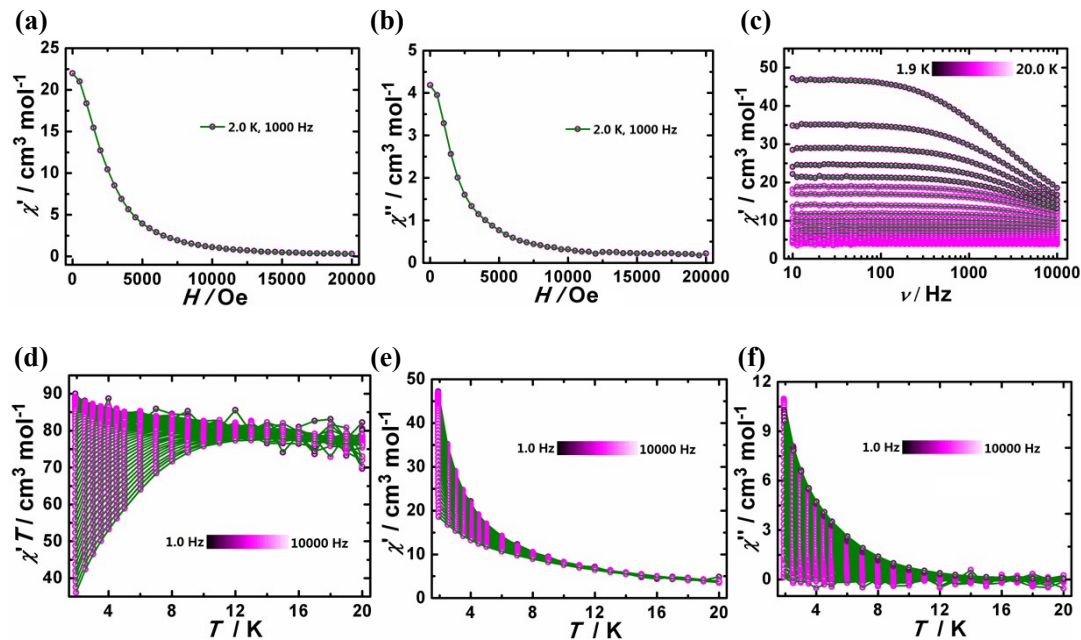

**Figure S21.** Field dependence of the  $\chi'$  (a) and  $\chi''$  (b) products,  $ac$  susceptibility of **2** at 1000 Hz and 2 K. Frequency dependence of the  $\chi'$  (c) product,  $ac$  susceptibilities under zero  $dc$  field. Temperature dependence of the  $\chi'T$  (d),  $\chi'$  (e) and  $\chi''$  (f) products,  $ac$  susceptibilities (PPMS).
